# Supplementary material for: A Highly Flexible Supercapacitor Based on MnO2/RGO Nanosheets and Bacterial Cellulose-Filled Gel Electrolyte
Source: MDPI journal article supplement (doi:10.3390/ma10111251), 2017-10-30
Supplement: s1 [file s1]

# A Highly Flexible Supercapacitor Based on MnO<sub>2</sub>/RGO Nanosheets and Bacterial Cellulose-Filled Gel Electrolyte

Haojie Fei <sup>1,\*</sup>, Nabanita Saha <sup>1</sup>, Natalia Kazantseva <sup>1</sup>, Robert Moucka <sup>1</sup>, Qilin Cheng <sup>1,2</sup> and Petr Saha <sup>1</sup>

<sup>1</sup> Centre of Polymer Systems, Tomas Bata University in Zlin, Tř. T. Bati 5678, 76001 Zlin, Czech Republic; nabanita@cps.utb.cz (N.S.); kazantseva@cps.utb.cz (N.K.); moucka@cps.utb.cz (R.M.); chengql@ecust.edu.cn (Q.C.); saha@utb.cz (P.S.)

<sup>2</sup> Key Laboratory for Ultrafine Materials of Ministry of Education, School of Materials Science and Engineering, East China University of Science and Technology, Shanghai 200237, China

\* Correspondence: haojie@cps.utb.cz; Tel.: +420-57603-8156

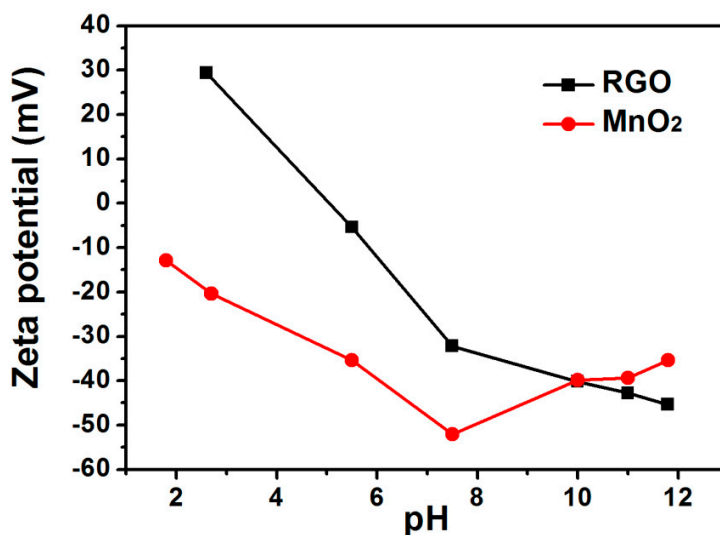

**Figure S1.** Zeta potential of RGO and MnO<sub>2</sub> as a function of pH, in aqueous dispersion, adjusted by HCl and NH<sub>3</sub>·H<sub>2</sub>O

**Table S1.** Zeta potentials (Z) of RGO and MnO<sub>2</sub> at various pH, respectively.

| pH                         | 1.8   | 2.6  | 2.7   | 5.5   | 7.5   | 10    | 11    | 11.8  |
|----------------------------|-------|------|-------|-------|-------|-------|-------|-------|
| Z of RGO (mV)              | –     | 29.4 | –     | -5.4  | -32.2 | -40.2 | -42.8 | -45.4 |
| Z of MnO <sub>2</sub> (mV) | -12.9 | –    | -20.4 | -35.4 | -52.1 | -39.8 | -39.4 | -35.4 |

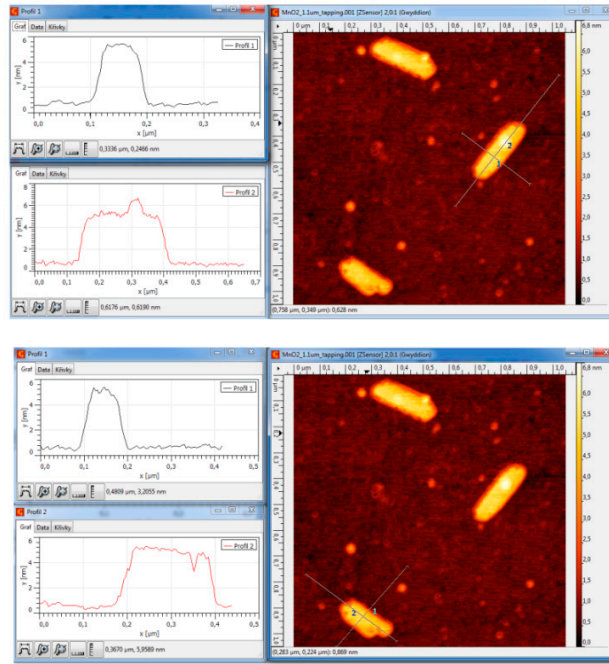

**Figure S2.** AFM images of MnO<sub>2</sub> show a uniform thickness of  $\sim 4.5$  nm.

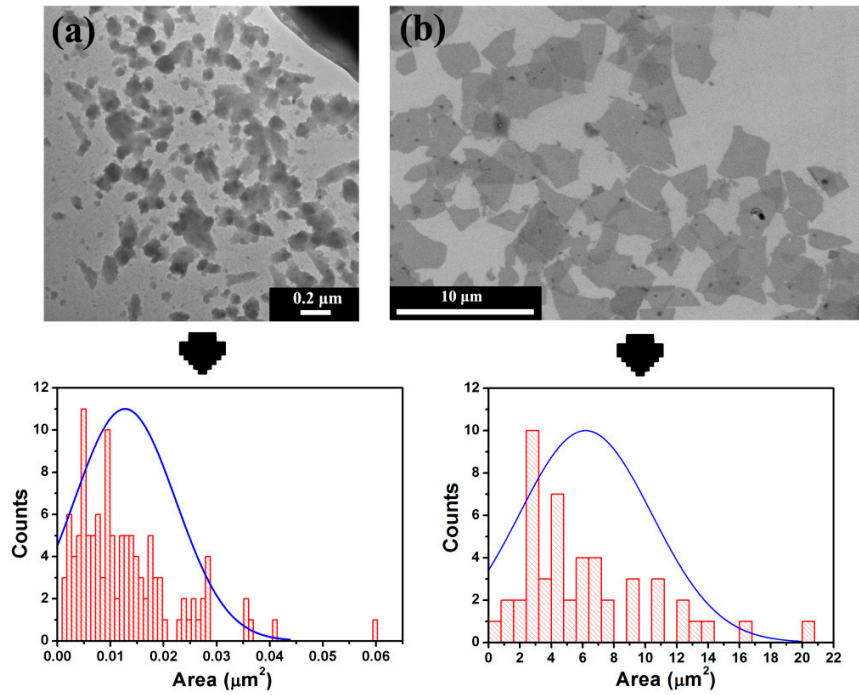

**Figure S3.** (a) TEM image of MnO<sub>2</sub> presents a lateral size of 100  $\sim$  300 nm; (b) SEM image of RGO on silicon wafer shows a lateral size of 2  $\sim$  5  $\mu\text{m}$  and their corresponding area distribution.

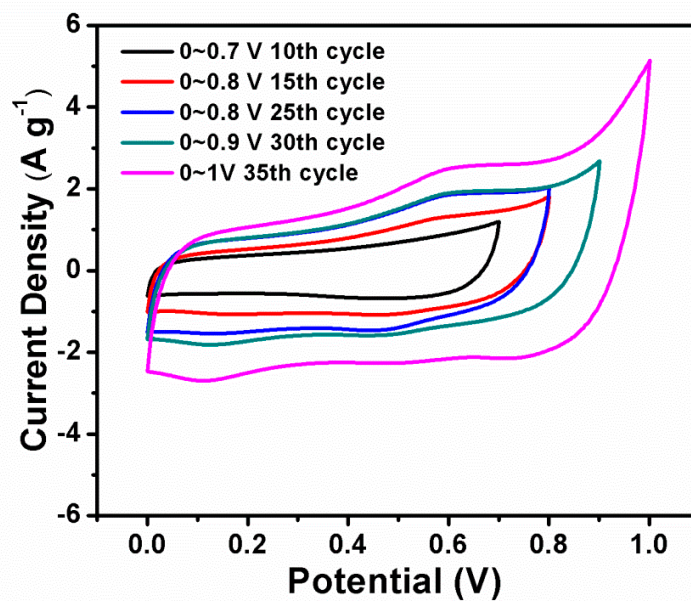

**Figure S4.** CV curves of  $\text{MnO}_2/\text{RGO}$  at a scan rate of  $10 \text{ mV s}^{-1}$  with various cycles collected in a three-electrode system with an  $\text{Ag}/\text{AgCl}$  reference in  $1 \text{ M Na}_2\text{SO}_4$ . The redox peaks appear when the potential window extended and increases after cycling.
